# Supplementary material for: Equilibrium swelling of thermo-responsive copolymer microgels
Source: Royal Society of Chemistry journal article supplement (doi:10.1039/d0ra08619c), 2020-01-01
Supplement: d0ra08619c1.pdf [file d0ra08619c1.pdf]

Supplementary material  
Equilibrium swelling of thermo-responsive copolymer  
microgels

A.D. Drozdov and J. deClaville Christiansen  
Department of Materials and Production  
Aalborg University  
Fibigerstraede 16, Aalborg 9220, Denmark

## Governing equations

Inserting expressions (6), (7) and (11) into Eq. (5) for the specific Helmholtz free energy  $\Psi$  and using Eq. (12), we find that

$$\Psi = \mu^0 C + k_B T_0 C \left( \ln \frac{Cv}{1+Cv} + \frac{\chi}{1+Cv} \right) + \sum_{m=1}^2 W_m(I_{e1}^{(m)}, I_{e2}^{(m)}, I_{e3}^{(m)}). \quad (\text{S-1})$$

Differentiation of Eq. (S-1) with respect to time implies that

$$\begin{aligned} \dot{\Psi} = & \left[ \mu^0 + k_B T_0 \left( \ln \frac{Cv}{1+Cv} + \frac{1}{1+Cv} + \frac{\chi}{(1+Cv)^2} \right) \right] \dot{C} \\ & + \sum_{m=1}^2 \left( \frac{\partial W_m}{\partial I_{e1}^{(m)}} \dot{I}_{e1}^{(m)} + \frac{\partial W_m}{\partial I_{e2}^{(m)}} \dot{I}_{e2}^{(m)} + \frac{\partial W_m}{\partial I_{e3}^{(m)}} \dot{I}_{e3}^{(m)} \right), \end{aligned} \quad (\text{S-2})$$

the superscript dot stands for the derivative with respect to time  $t$ . In derivation of Eq. (S-2),  $\chi$  is treated as a constant due to condition (13).

The derivatives of the principal invariants  $I_{e1}^{(m)}$ ,  $I_{e2}^{(m)}$ ,  $I_{e3}^{(m)}$  of the tensors  $\mathbf{B}_e^{(m)}$  ( $m = 1, 2$ ) read

$$\dot{I}_{e1}^{(m)} = 2\mathbf{B}_e^{(m)} : \mathbf{D}, \quad \dot{I}_{e2}^{(m)} = 2 \left( I_{e2}^{(m)} \mathbf{I} - I_{e3}^{(m)} (\mathbf{B}_e^{(m)})^{-1} \right) : \mathbf{D}, \quad \dot{I}_{e3}^{(m)} = 2I_{e3}^{(m)} \mathbf{I} : \mathbf{D}, \quad (\text{S-3})$$

where the colon denotes convolution,  $\mathbf{L} = \dot{\mathbf{F}} \cdot \mathbf{F}^{-1}$  is the velocity gradient, and  $\mathbf{D} = \frac{1}{2}(\mathbf{L} + \mathbf{L}^\top)$  is the rate-of-strain tensor. It follows from Eqs. (S-2) and (S-3) that

$$\dot{\Psi} = K \dot{C} + 2\mathbf{K} : \mathbf{D}, \quad (\text{S-4})$$

where

$$\begin{aligned} K &= \mu^0 + k_B T_0 \left[ \ln \frac{Cv}{1+Cv} + \frac{1}{1+Cv} + \frac{\chi}{(1+Cv)^2} \right], \\ \mathbf{K} &= \sum_{m=1}^2 \left[ \frac{\partial W_m}{\partial I_{e1}^{(m)}} \mathbf{B}_e^{(m)} - I_{e3}^{(m)} \frac{\partial W_m}{\partial I_{e2}^{(m)}} (\mathbf{B}_e^{(m)})^{-1} + \left( I_{e2}^{(m)} \frac{\partial W_m}{\partial I_{e2}^{(m)}} + I_{e3}^{(m)} \frac{\partial W_m}{\partial I_{e3}^{(m)}} \right) \mathbf{I} \right]. \end{aligned} \quad (\text{S-5})$$

To develop constitutive equations for a TR gel, we apply the free energy imbalance inequality

$$\dot{\Psi} - u_{\text{mec}} - u_{\text{dif}} \leq 0, \quad (\text{S-6})$$

where  $u_{\text{mec}}$  and  $u_{\text{dif}}$  denote works (per unit volume in the initial state and unit time) produced by stresses and diffusion of solvent molecules.

The specific mechanical work is determined by the conventional formula

$$u_{\text{mec}} = J\boldsymbol{\Sigma} : \mathbf{D}, \quad (\text{S-7})$$

where  $J = \det \mathbf{F}$ , and  $\boldsymbol{\Sigma}$  is the Cauchy stress tensor.

The specific work produced by solvent transport is determined by

$$u_{\text{dif}} = \mu\dot{C} + \bar{u}_{\text{dif}} \quad (\text{S-8})$$

with

$$\bar{u}_{\text{dif}} \geq 0. \quad (\text{S-9})$$

Eq. (S-6) is satisfied when the functions  $C$  and  $\mathbf{F}$  are connected by the molecular incompressibility condition (1). To account for this connection, we differentiate Eq. (1) with respect to time and find that

$$\dot{C}v - J\mathbf{I} : \mathbf{D} = 0. \quad (\text{S-10})$$

We now multiply Eq. (S-10) by an arbitrary function  $\Pi$  (pressure treated as a Lagrange multiplier) and add the result to Eq. (S-6). Using Eqs. (S-4), (S-7) and (S-8), we arrive at the formula

$$(K + \Pi v - \mu)\dot{C} + [2\mathbf{K} - J(\boldsymbol{\Sigma} + \mathbf{III})] : \mathbf{D} - \bar{u}_{\text{dif}} \leq 0. \quad (\text{S-11})$$

Keeping in mind that  $C$  and  $\mathbf{D}$  are arbitrary functions and using Eq. (S-9), we conclude that inequality (S-11) is fulfilled, provided that the chemical potential  $\mu$  of water molecules reads

$$\mu = \mu^0 + k_{\text{B}}T_0\bar{\mu}, \quad \bar{\mu} = \ln \frac{Q}{1+Q} + \frac{1}{1+Q} + \frac{\chi}{(1+Q)^2} + \frac{\Pi v}{k_{\text{B}}T_0}, \quad (\text{S-12})$$

and the Cauchy stress tensor  $\boldsymbol{\Sigma}$  is given by

$$\boldsymbol{\Sigma} = -\Pi\mathbf{I} + \frac{2}{1+Q} \sum_{m=1}^2 \left[ \frac{\partial W_m}{\partial I_{e1}^{(m)}} \mathbf{B}_e^{(m)} - I_{e3}^{(m)} \frac{\partial W_m}{\partial I_{e2}^{(m)}} (\mathbf{B}_e^{(m)})^{-1} + \left( I_{e2}^{(m)} \frac{\partial W_m}{\partial I_{e2}^{(m)}} + I_{e3}^{(m)} \frac{\partial W_m}{\partial I_{e3}^{(m)}} \right) \mathbf{I} \right], \quad (\text{S-13})$$

where degree of swelling  $Q$  is given by Eq. (15).

Eqs. (S-12) and (S-13) provide constitutive equations for the mechanical response of a TR gel. Adopting the neo-Hookean expressions (9) for the functions  $W_m$ , we present Eq. (S-13) in the form

$$\boldsymbol{\Sigma} = -\Pi\mathbf{I} + \frac{1}{1+Q} \left[ G_1(\mathbf{B}_e^{(1)} - \mathbf{I}) + G_2(\mathbf{B}_e^{(2)} - \mathbf{I}) \right]. \quad (\text{S-14})$$

We consider unconstrained equilibrium swelling of a TR gel in a water bath with a fixed temperature  $T$  when pressure in the bath is disregarded,

$$\Pi^{\text{bath}} = 0. \quad (\text{S-15})$$

Under equilibrium,  $Q$  is independent of spatial coordinates (it depends on temperature  $T$  only), and the deformation gradient reads

$$\mathbf{F} = (1 + Q)^{\frac{1}{3}} \mathbf{I}. \quad (\text{S-16})$$

Combining Eqs. (S-14) and (S-16) and using Eqs. (3) and (4), we find that

$$\boldsymbol{\Sigma} = \Sigma \mathbf{I}, \quad \Sigma = -\Pi + \frac{1}{1+Q} \left\{ G_1 \left[ \left( \frac{1+Q}{1+Q_0} \right)^{\frac{2}{3}} - 1 \right] + G_2 \left[ (1+Q)^{\frac{2}{3}} - 1 \right] \right\}. \quad (\text{S-17})$$

It follows from the equilibrium conditions and Eq. (S-15) that

$$\Sigma = 0.$$

Insertion of Eq. (S-17) into this equality implies that

$$\Pi = \frac{1}{1+Q} \left\{ G_1 \left[ \left( \frac{1+Q}{1+Q_0} \right)^{\frac{2}{3}} - 1 \right] + G_2 \left[ (1+Q)^{\frac{2}{3}} - 1 \right] \right\}. \quad (\text{S-18})$$

The chemical potential of water molecules in a gel is determined by Eq. (S-12). Its chemical potential in the bath is given by the same equality where the terms describing interactions between water molecules and segments of chains are disregarded,

$$\mu^{\text{bath}} = \mu^0. \quad (\text{S-19})$$

Substituting expressions (S-12) and (S-19) into the equilibrium condition

$$\mu = \mu^{\text{bath}}, \quad (\text{S-20})$$

and using Eq. (S-18), we arrive at the nonlinear equation for the equilibrium degree of swelling,

$$\ln \frac{Q}{1+Q} + \frac{1}{1+Q} + \frac{\chi}{(1+Q)^2} + \frac{g_1}{1+Q} \left[ \left( \frac{1+Q}{1+Q_0} \right)^{\frac{2}{3}} - 1 \right] + \frac{g_2}{1+Q} \left[ (1+Q)^{\frac{2}{3}} - 1 \right] = 0, \quad (\text{S-21})$$

where dimensionless elastic moduli  $g_m$  are given by Eq. (17).

# Tables

**Table S-1:** Material parameters for copolymer gels

| Comonomer         | $Q_0$     | $g_1$       | $\chi_{\max}$ | $\tilde{\chi}_{\text{co}}$ | $\bar{g}_2$ | $\beta$ | Fig. |
|-------------------|-----------|-------------|---------------|----------------------------|-------------|---------|------|
| tBA               | 1.0       | 0.01        | 0.64          | 4.17                       | 4.0         | 0.04    | 1A   |
| NtBA <sub>m</sub> | 0.1       | 0.009–0.017 | 0.58          | 4.06                       | 4.0         | 0.08    | 2A   |
| HEMA              | 2.7–9.5   | 0.12        | 0.58          | 1.56                       | 0.3         | 0.09    | 3A   |
| HEMA              | 0.5–1.2   | 0.04        | 0.54          | 1.56                       | 0.5         | 0.10    | S-3A |
| TREGMA            | 12.0–17.3 | 0.10        | 0.63          | −1.11                      | 3.5         | 0.10    | 4A   |
| DMAA <sub>m</sub> | 3.5–4.0   | 0.06        | 0.58          | −1.81                      | 0.8         | 0.09    | 5A   |
| DMAA <sub>m</sub> | 1.7–3.1   | 0.03        | 0.50          | −1.81                      | 3.2         | 0.10    | 6A   |
| AA <sub>m</sub>   | 7.0–10.1  | 0.03        | 0.51          | −4.12                      | 2.8         | 0.09    | 7A   |

**Table S-2:** The FH parameter for comonomers  $\tilde{\chi}_{\text{co}}$  versus their Hildebrand solubility  $\delta_{\text{H}}$ .

| Comonomer         | $\tilde{\chi}_{\text{co}}$ | $\delta_{\text{H}}$ (MPa) <sup>½</sup> |
|-------------------|----------------------------|----------------------------------------|
| tBA               | 4.17                       | 16.74                                  |
| NtBA <sub>m</sub> | 4.06                       | 20.43                                  |
| HEMA              | 1.56                       | 23.81                                  |
| TREGMA            | −1.11                      | 21.73                                  |
| DMAA <sub>m</sub> | −1.81                      | 24.26                                  |
| AA <sub>m</sub>   | −4.12                      | 25.71                                  |

# Figures

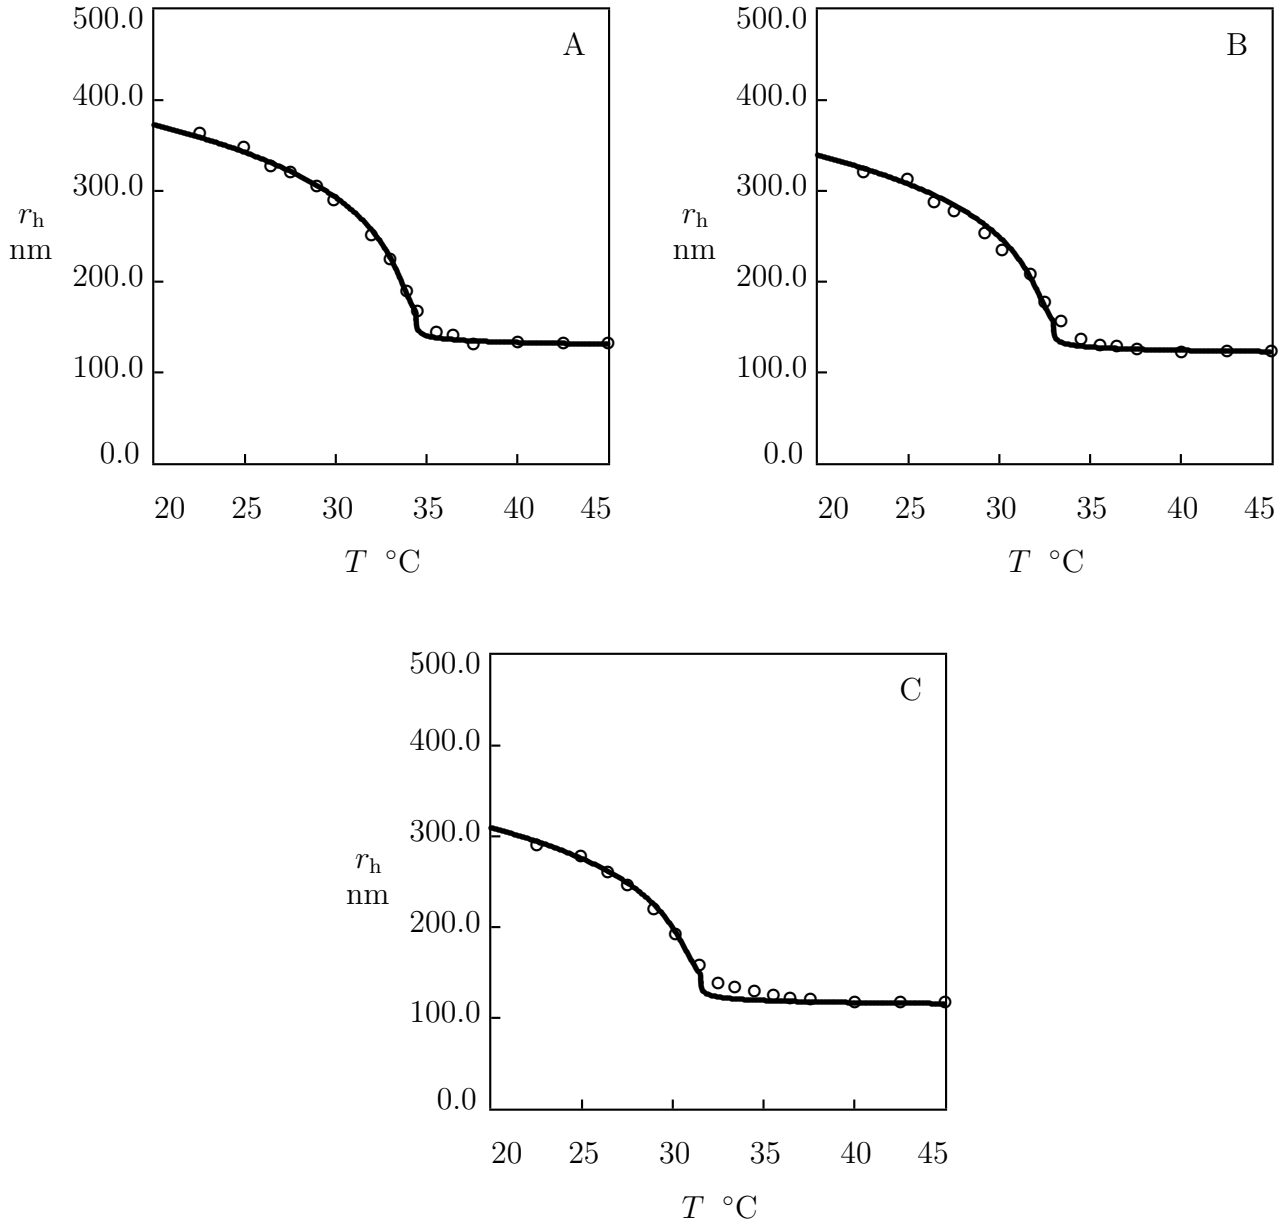

Figure S-1: Hydrodynamic radius  $r_h$  of microgel particles versus temperature  $T$ . Circles: experimental data [53] on P(NIPAm-tBA) microgels with molar fractions of comonomers  $c_{co} = 0.11$  (A),  $c_{co} = 0.16$  (B), and  $c_{co} = 0.21$  (C). Solid lines: results of simulation.

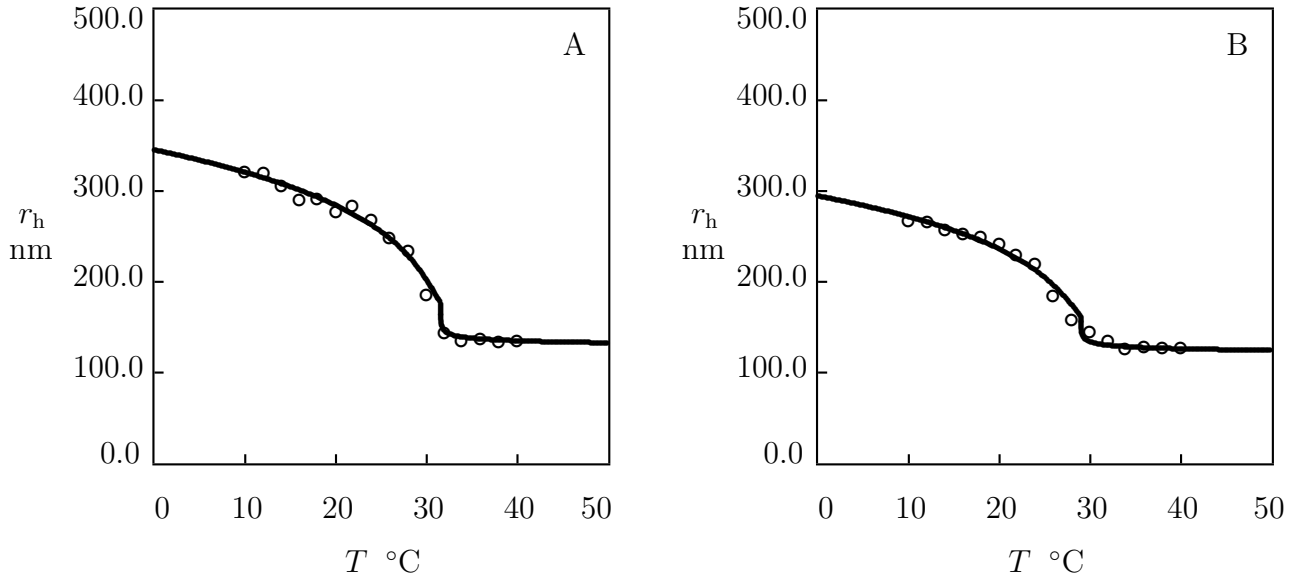

Figure S-2: Hydrodynamic radius  $r_2$  of microgel particles versus temperature  $T$ . Symbols: experimental data [55] on P(NIPAm-NtBAm) microgels with molar fractions of comonomers  $c_{co} = 0.05$  (A) and  $c_{co} = 0.10$  (B). Solid lines: results of simulation.

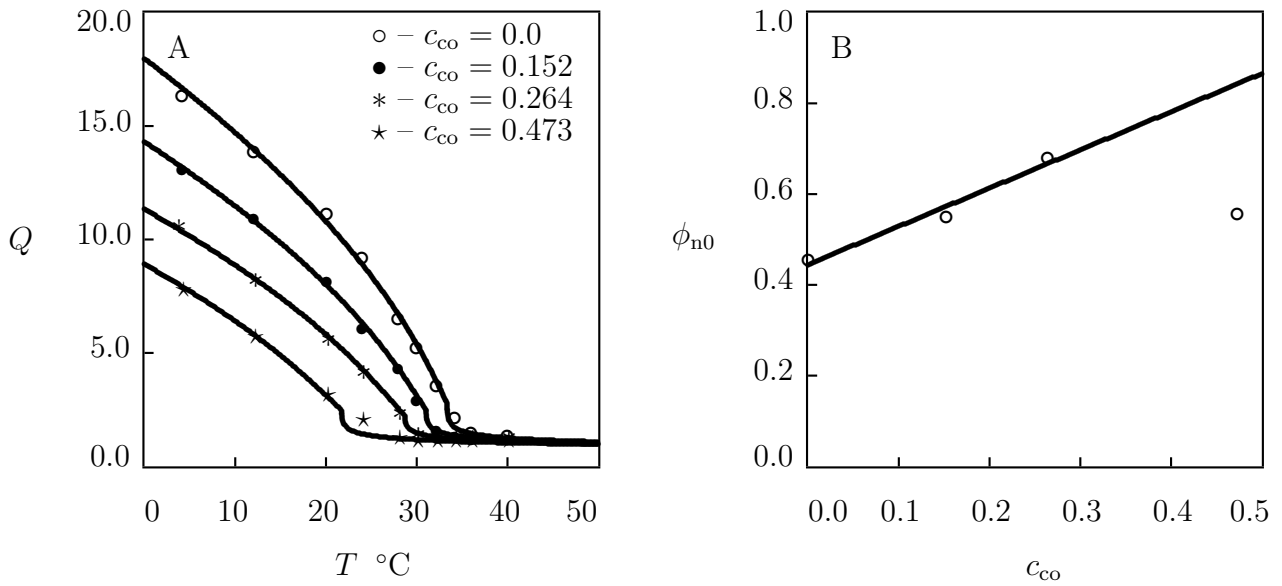

Figure S-3: A – Degree of swelling  $Q$  versus temperature  $T$ . Symbols: experimental data [59] on P(NIPAm-HEMA) gels with various molar fractions of comonomers  $c_{co}$ . Solid lines: results of simulation. B – Parameter  $\phi_{n0}$  versus molar fraction of comonomers  $c_{co}$ . Circles: treatment of observations. Solid line: results of simulation.

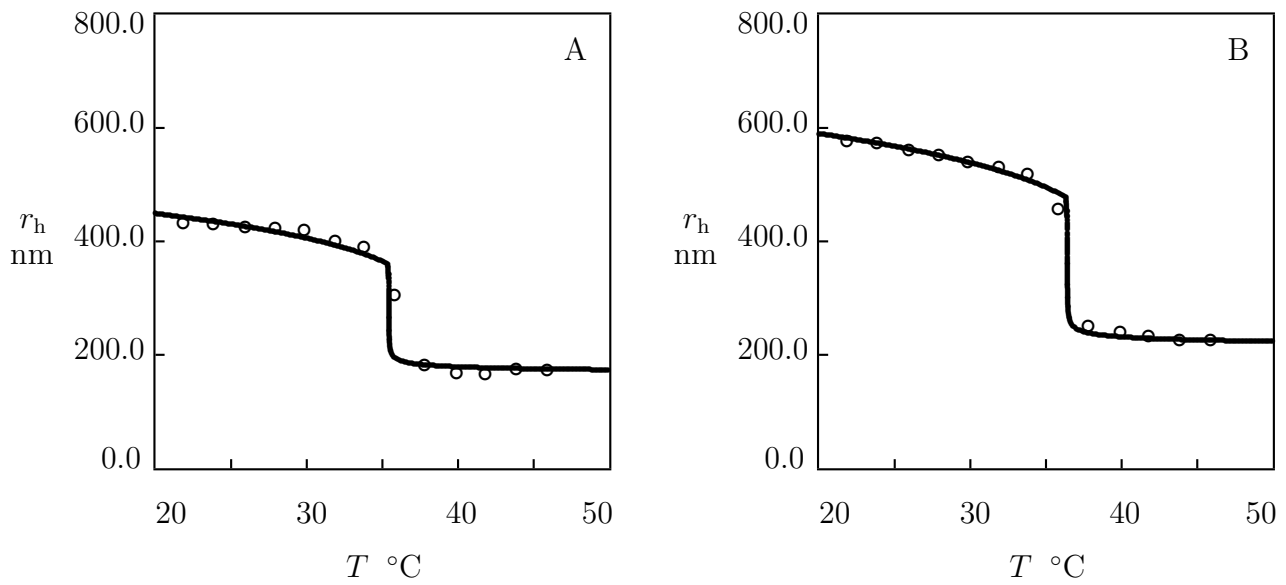

Figure S-4: Hydrodynamic radius  $r_h$  of microgel particles versus temperature  $T$ . Circles: experimental data [60] on P(NIPAm-TREGMA) microgels with molar fractions of comonomers  $c_{co} = 0.04$  (A) and  $c_{co} = 0.08$  (B). Solid lines: results of simulation.



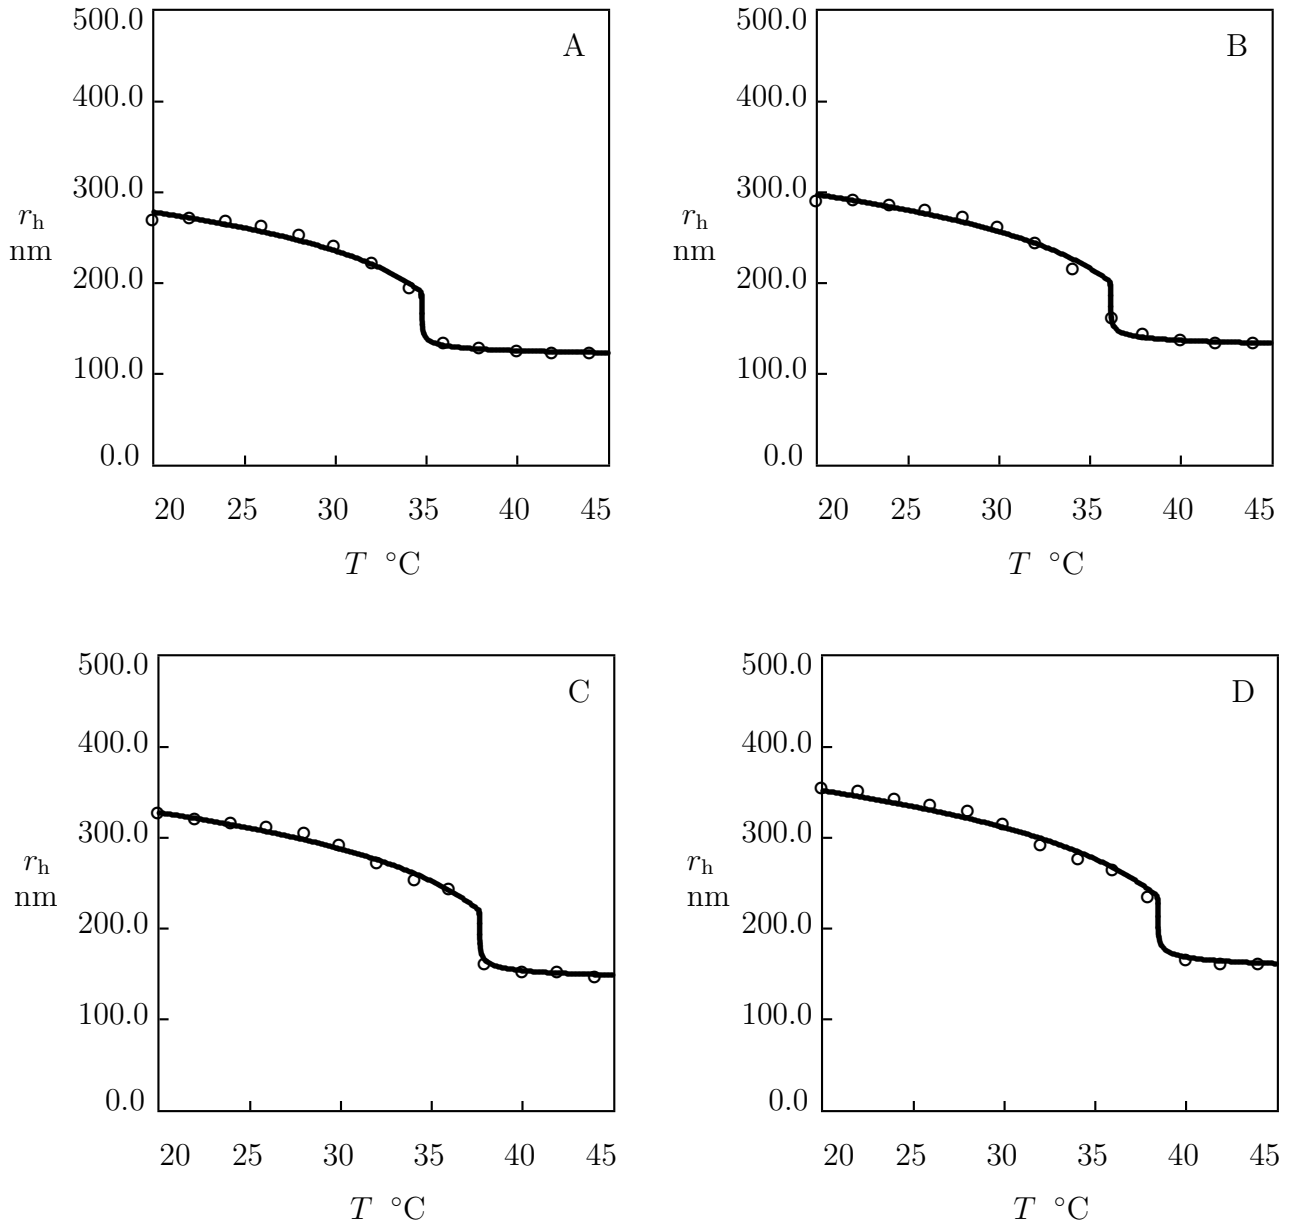

Figure S-5: Hydrodynamic radius  $r_h$  of microgel particles versus temperature  $T$ . Circles: experimental data [63] on P(NIPAm-DMAAm) microgels with molar fractions of comonomers  $c_{\text{co}} = 0.06$  (A),  $c_{\text{co}} = 0.10$  (B),  $c_{\text{co}} = 0.14$  (C) and  $c_{\text{co}} = 0.16$  (D). Solid lines: results of simulation.
